1           **Patterns of Crimean-Congo haemorrhagic fever virus seroprevalence in**  
2                           **human and livestock populations in northern Tanzania**

3   Ellen C Hughes<sup>1,2,8\*</sup>, William de Glanville<sup>2</sup>, Tito Kibona<sup>3</sup>, Blandina Theophil Mmbaga<sup>4</sup>,

4   Melinda K Rostal<sup>5</sup>, Emanuel Swai<sup>6</sup>, Sarah Cleaveland<sup>2</sup>, Felix Lankester<sup>7</sup>, Brian J Willett<sup>8</sup>,

5   Kathryn J Allan<sup>2</sup>

6   1 University of Liverpool Institute of Infection Veterinary and Ecological Sciences, Department of livestock and  
7   One Health, Brownlow Hill, Liverpool, UK; 2 University of Glasgow College of Medical Veterinary and Life  
8   Sciences, School of Biodiversity, One Health and Veterinary Medicine, Glasgow, UK; 3 Nelson Mandela African  
9   Institute of Science and Technology, Arusha, Tanzania; 4 Kilimanjaro Christian Medical University College,  
10   Kilimanjaro Clinical Research Institute, Moshi, Kilimanjaro, Tanzania; 5 EcoHealth Alliance, Health and Policy,  
11   New York, NY, US; 6 Ministry of Agriculture Livestock and Fisheries, Department of Veterinary Services,  
12   Dodoma, Tanzania; 7 Washington State University, Paul G. Allen School for Global Health, Pullman, WA, US; 8  
13   MRC-University of Glasgow Centre for Virus Research, Glasgow, UK

14       • Corresponding author Ellen C Hughes, [ellen.hughes@liverpool.ac.uk](mailto:ellen.hughes@liverpool.ac.uk), c/o MRC-University of Glasgow  
15       Centre for Virus Research, Glasgow, UK

16   **Abstract**

17   Results from a cross-sectional study of Crimean-Congo haemorrhagic fever virus (CCHFV) in  
18   northern Tanzania demonstrated high seroprevalence in humans and ruminant livestock  
19   with high levels of spatial heterogeneity. CCHFV may represent an unrecognised human  
20   health risk in this region and drivers of exposure need further investigation.

21

## 22 **Research Letter**

23 Crimean-Congo haemorrhagic fever virus (CCHFV) is a tick-borne orthonavivirus with the  
24 potential to cause severe haemorrhagic fever in humans and for onward human-to-human  
25 transmission [1]. The virus is a World Health Organization priority pathogen for research and  
26 development [2]. A wide range of wild and domestic animals can be infected [3], but CCHFV  
27 does not typically cause clinical disease in non-human species [1]. In eastern Africa, since  
28 2013 intermittent outbreaks of disease in humans have occurred in Uganda but the  
29 epidemiology remains poorly understood [4]. Northern Tanzania has been identified as an  
30 area likely to be at high risk of CCHF in humans [5] but no clinical cases have yet been  
31 reported in the country.

32 To investigate CCHFV exposure in northern Tanzania, we performed serological testing on  
33 human and ruminant livestock sera collected in 2016 using a multilevel sampling frame from  
34 351 humans and 7456 livestock in linked households in Arusha and Manyara Regions (Figure  
35 1) [6]. Sera were tested using a multi-species ELISA (ID Screen®, IDvet, Grabels, France) and  
36 seroprevalence estimated using the *Survey* package in R [7]. We assessed species-level  
37 differences in seroprevalence using a mixed-effects model with household and village as  
38 random effects. Patterns of spatial autocorrelation in village-level seroprevalence were  
39 investigated using Moran's I statistic and correlation of village-level seroprevalence  
40 between species pairs was assessed using Pearson's correlation coefficient (appendix).

41 Overall seroprevalence was high in all livestock species (cattle: 49.6% (95% Confidence  
42 interval (CI) 40.0-59.2); goats: 33.8% (95% CI 21.7-47.5); sheep: 27.8% (95% CI 17.0-40.6)  
43 (Table 1, Figure 1), with sheep and goats having significantly lower odds of exposure than  
44 cattle (Sheep OR=0.32 (95% CI 0.27-0.37),  $p < 0.001$ ; Goats OR=0.45 (95% CI 0.39-0.51),

45  $p < 0.001$ ). Village-level seroprevalence ranged widely to a maximum of  $> 70\%$  in each of the  
46 three livestock species (Table 1). While livestock seroprevalence can vary widely, these  
47 values were consistent with those reported elsewhere in East Africa [3]. The finding of a  
48 higher seroprevalence in cattle than in sheep and goats is also consistent with other settings  
49 in Africa [3] and may reflect differences in host feeding preferences of *Hyalomma* spp. ticks,  
50 considered to be important vectors of CCHFV [1]. However, further work is required to  
51 understand the relative contribution of different host species to viral maintenance, as well  
52 as their relationship to human infection risk.

53 Overall human seroprevalence was 15.1% (95% CI 11.7-19.2) but village-level  
54 seroprevalence varied widely between study sites (Table 1). Seroprevalence was similar to  
55 that reported in health-care-seeking patients in Kenya in 2012 [10] but higher than the 1.2%  
56 values reported in community participants elsewhere in Tanzania [8]. However, given the  
57 substantial between-village variation observed (Table 1), interpretation of these regional  
58 comparisons is challenging.

59 Assessment of spatial autocorrelation via Moran's I statistic (Table 1) showed no evidence of  
60 village-level spatial autocorrelation in livestock, suggesting that although context-specific  
61 drivers such as husbandry practices and local agro-ecology are likely important, drivers of  
62 exposure were not observable at a broader landscape level. In contrast, significant positive  
63 spatial autocorrelation was observed in the village-level human seroprevalence (Moran's I  
64 statistic 0.43,  $p < 0.001$ ). Additionally, species-pair correlations showed that village-level  
65 human and livestock seroprevalence were not correlated ( $\rho = 0.16$  ( $p = 0.51$ )), with high  
66 human seroprevalence seen in some low livestock prevalence locations and vice versa  
67 (Appendix). This heterogeneity, in combination with the differences in spatial distribution,

68 suggest different possible drivers of exposure in livestock and human populations. For  
69 example, the infection prevalence of ticks in the peri-domestic environment may be a more  
70 important driver of infection for people than for livestock, which may be exposed across a  
71 wide range of environments when moving for grazing and water. However, as discrepancies  
72 in sample size may have exaggerated these differences, further linked investigation into  
73 human and livestock exposure and patterns of tick infection is required.

74 The high exposure levels to CCHFV in people implies that clinical CCHF is a potentially  
75 serious, underdiagnosed health risk in this population and suggests that CCHF should be  
76 included as a differential diagnosis for undifferentiated febrile illness in northern Tanzania.  
77 However, evidence of human seropositivity in the absence of clinical cases, even where  
78 health professionals are familiar with CCHF diagnosis, is common [9, 10]. The causes of  
79 disease emergence in such human populations are poorly understood and further research  
80 into regions such as northern Tanzania, where the virus is endemic but human disease has  
81 not been reported, is critical to understanding human disease risk.

82 Three key findings arise from this study: (a) CCHFV is circulating widely in both humans and  
83 livestock across northern Tanzania; (b) CCHFV seroprevalence shows high spatial  
84 heterogeneity and further investigations are needed to understand drivers of exposure; (c)  
85 high human seroprevalence demonstrates widespread exposure of people to the virus and  
86 suggests that CCHF should be included as a differential diagnosis for febrile illness in this  
87 region.

#### 88 **Conflict of interest**

89 The authors declare no conflicts of interest.

90 **References**

- 91 1. Bente, D.A., et al., *Crimean-Congo hemorrhagic fever: history, epidemiology,*  
92 *pathogenesis, clinical syndrome and genetic diversity.* Antiviral Res, 2013. **100**(1): p.  
93 159-89.
- 94 2. WHO, W.H.O. *Prioritizing diseases for research and development in emergency*  
95 *contexts.* 2022 [cited 2022 26/02/2022]; Available from:  
96 [https://www.who.int/activities/prioritizing-diseases-for-research-and-development-](https://www.who.int/activities/prioritizing-diseases-for-research-and-development-in-emergency-contexts)  
97 [in-emergency-contexts.](https://www.who.int/activities/prioritizing-diseases-for-research-and-development-in-emergency-contexts)
- 98 3. Spengler, J.R., E. Bergeron, and P.E. Rollin, *Seroepidemiological Studies of Crimean-*  
99 *Congo Hemorrhagic Fever Virus in Domestic and Wild Animals.* PLoS Negl Trop Dis,  
100 2016. **10**(1): p. e0004210.
- 101 4. Balinandi, S., et al., *Serological and molecular study of Crimean-Congo Hemorrhagic*  
102 *Fever Virus in cattle from selected districts in Uganda.* Journal of virological methods,  
103 2021. **290**: p. 114075-114075.
- 104 5. Messina, J.P., et al., *The global distribution of Crimean-Congo hemorrhagic fever.*  
105 *Trans R Soc Trop Med Hyg,* 2015. **109**(8): p. 503-13.
- 106 6. Herzog, C.M., et al., *Pastoral production is associated with increased peste des petits*  
107 *ruminants seroprevalence in northern Tanzania across sheep, goats and cattle.*  
108 *Epidemiol Infect,* 2019. **147**: p. e242.
- 109 7. Lumley, T., *survey: analysis of complex survey samples, in R package version 4.0.*  
110 2004.
- 111 8. Rugarabamu, S., et al., *Seroprevalence and associated risk factors of selected*  
112 *zoonotic viral hemorrhagic fevers in Tanzania.* International Journal of Infectious  
113 *Diseases,* 2021. **109**: p. 174-181.

- 114 9. Hoogstraal, *The Epidemiology of tick-borne CCHF in Asia Europe and Africa*. 1979.
- 115 10. Christova, I., et al., *High seroprevalence for Crimean-Congo haemorrhagic fever virus*  
116 *in ruminants in the absence of reported human cases in many regions of Bulgaria*.  
117 *Exp Appl Acarol*, 2018. **75**(2): p. 227-234.
- 118
- 119

Table 1: Seroprevalence of Crimean-Congo haemorrhagic fever virus in cattle, sheep, goats and humans in northern Tanzania. Number tested, overall seroprevalence, seroprevalence range by village and Moran's I statistic for livestock and human serum samples collected in northern Tanzania in 2016 and tested for antibodies to Crimean-Congo haemorrhagic fever virus. Moran's I statistic and associated p value are shown for the village level.

| Species | Tested (N) | Seroprevalence (95% CI) | Seroprevalence range by village (95% CI) | Moran's I statistic (p value) |
|---------|------------|-------------------------|------------------------------------------|-------------------------------|
|         |            |                         |                                          | Village                       |
| Cattle  | 3015       | 49.6 (40.0-59.2)        | 5.3 (1.2-9.4) to 76.6 (70.3-82.8)        | -0.09 (p=0.60)                |
| Sheep   | 2059       | 27.8 (17.0-40.6)        | 0.0 (0-3.9) to 70.3 (55.5-85.0)          | -0.09 (p=0.57)                |
| Goats   | 2382       | 33.8 (21.7-47.5)        | 0.0 (0-3.9) to 70.3 (55.5-85.0)          | -0.10 (p=0.61)                |
| Human   | 351        | 15.1 (8.5 – 23.8)       | 0.0 (0.0-16.1) to 50 (30.7-69.2)         | 0.43 (p=0.001)                |

Figure 1: Seroprevalence of Crimean-Congo haemorrhagic fever virus for a) human, b) cattle, c) sheep and d) goats in villages in Arusha and Manyara regions, northern Tanzania

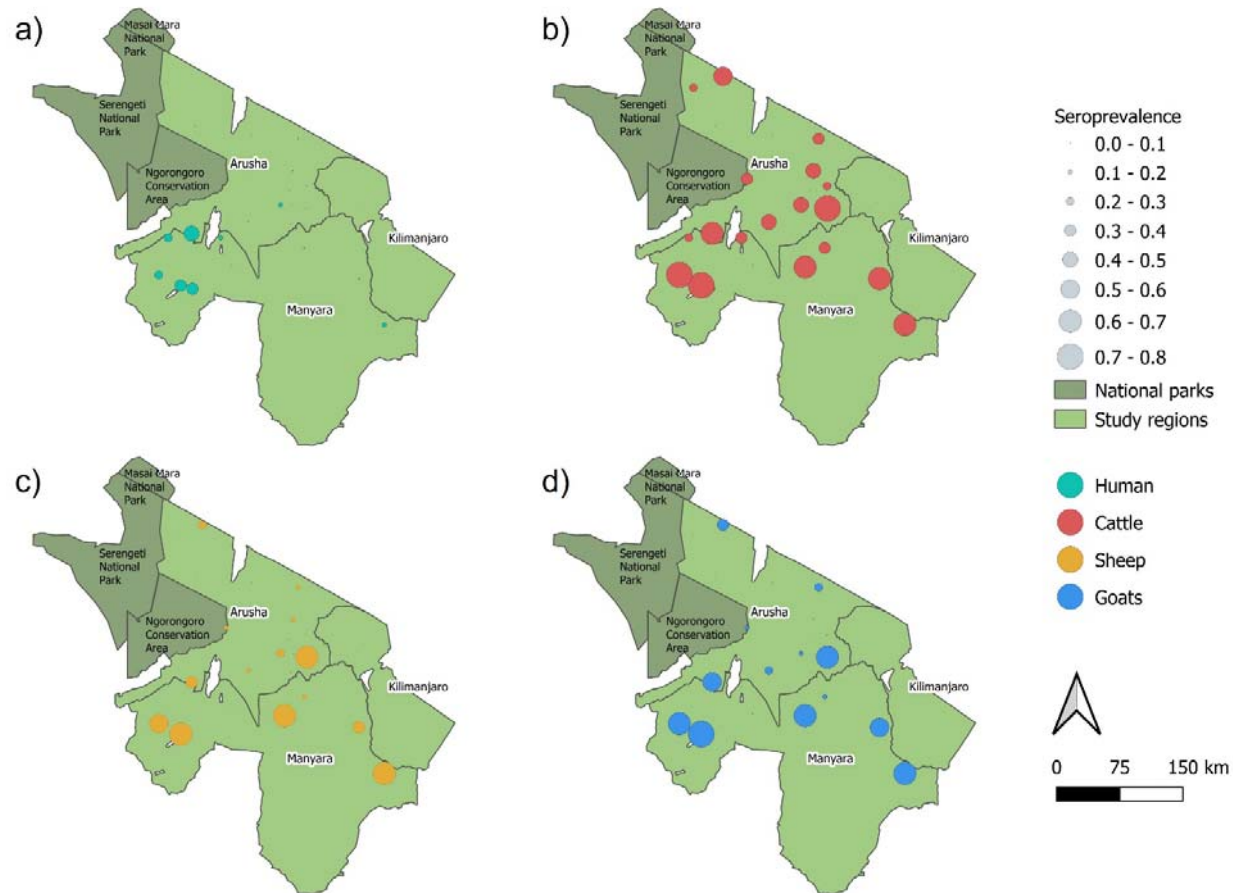

Source: https://www.medrxiv.org/content/10.1101/2023.08.31.23294720v1.full.pdf
